# Supplementary material for: Development and Evaluation of Recombinant B-Cell Multi-Epitopes of PDHA1 and GAPDH as Subunit Vaccines against Streptococcus iniae Infection in Flounder (Paralichthys olivaceus)
Source: MDPI journal article supplement (doi:10.3390/vaccines11030624), 2023-03-10

**Figure S1.** Flow cytometric analysis of T lymphocyte subsets labeled with rabbit polyclonal antibodies against CD4-1, CD4-2 and CD8 $\beta$  in PBLs, SPLs and HKLs.

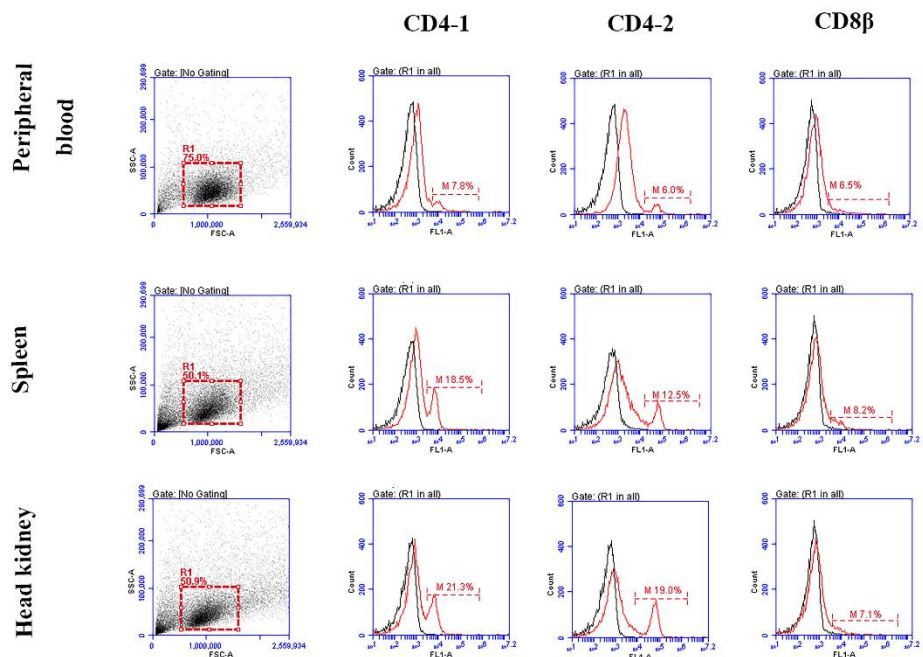

**Figure S2.** Flow cytometric analysis of IgM+ lymphocytes labeled with anti-serum IgM MAb 2D8.

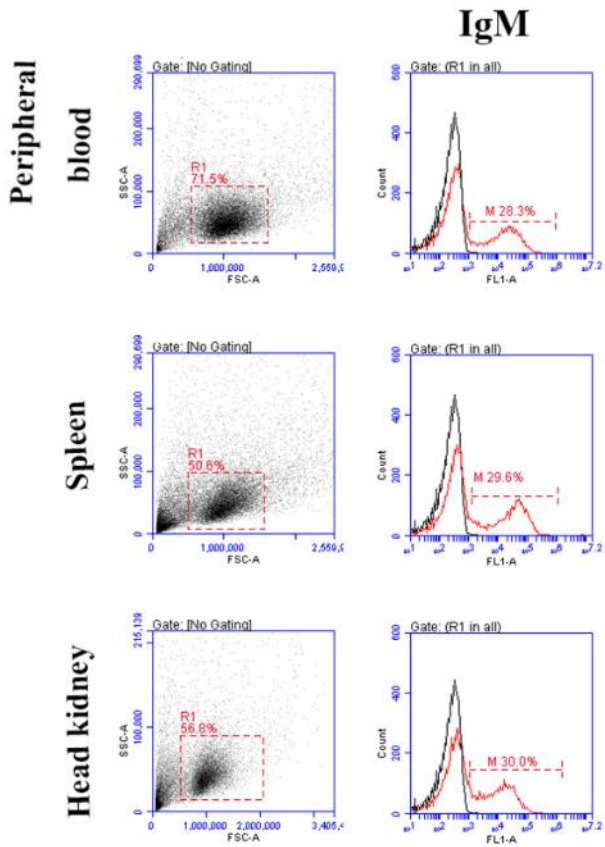

Supplement: s1 [file s1]
